# Supplementary material for: Prevalence of toxigenic fungi and mycotoxins in Arabic coffee (Coffea arabica): Protective role of traditional coffee roasting, brewing and bacterial volatiles
Source: PLoS One. 2021 Oct 29;16(10):e0259302. doi: 10.1371/journal.pone.0259302 (PMC8555823; doi:10.1371/journal.pone.0259302)
Supplement: S1 Data — (XLSX) [file pone.0259302.s001.xlsx]

## Sheet: Table 1 AFs
Sample	Green coffee (µg/kg)	Roasted coffee	Powdered coffee
1	0	7.55	34.07
2	11.48	34	70.21
3	12.7	25.11	89.9
4	13.25	41.9	118.15
5	6.74	48.75	127.89
6	3.03	25.46	29.01
7	14.57	67.42	95.53
8	10.75	18.67	136.08
9			114.42
Mean	9.065	33.6075	90.5844
SD	5.26043	18.8309	39.0751
Range	0 - 14.50	7.55 - 67.42	29.01 - 136.08

## Sheet: Table 1 OTA
Sample	Green coffee (µg/kg)	Roasted coffee	Powdered coffee
1	1.91	1.89	2.52
2	3.34	2.18	11.79
3	2.2	1.9	8.17
4	2.2	2.42	8.47
5	1.96	2.58	12.9
6	1.78	1.68	3.37
7	2.06	6.14	10.79
8	1.75	3.3	12.74
9			9.76
Mean	2.15	2.76125	8.94556
SD	0.509874	1.45716	3.79792
Range	1.75 - 3.34	1.68 - 6.14	2.52 - 12.74

## Sheet: Table 2 AF & OTA
		AF (µg/kg)	OTA (µg/kg)
Control	R1	32.4	1.34
	R2	29.7	1.65
	R3	25.8	1.4
	R4	24.5	1.23
	R5	30.2	1.4
	R6	30.5	1.28
	R7	31	1.32
	R8	30.9	1.45
	R9	35.45	1.4
Coffee+Fungi	R1	54.65	5
	R2	67.87	2.7
	R3	55.34	4.17
	R4	64	4.15
	R5	56	4.87
	R6	75.32	3.4
	R7	76.55	4.48
	R8	65.91	3.4
	R9	56.78	5
Coffee+Fungi+BS	R1	23.6	1.38
	R2	19	1.65
	R3	27.5	1.9
	R4	27.13	2.2
	R5	28.72	1.49
	R6	28	1.8
	R7	27.54	2.3
	R8	29.4	2.25
	R9	29	1.92

## Sheet: Figure 2 OTA
Effect of coffee roasting on OTA
Roasting conditions	Replicate 1	Reduction (%)	Replicate 2	Reduction (%)	Replicate 3	Reduction (%)	Mean reduction %	SD		Reduction value					Mean	SD
Unroasted	10.38		2.90661		3.10134
R1.0	9.72	6.35838	2.22998	23.3684	2.61117	15.7688	15.1652	8.52107		0.66		0.676634		0.490168	0.608934
R1.5	3.69	64.4509	1.65044	43.2838	2.08917	32.6075	46.7807	16.2072		6.69		1.25617		1.01217	2.98611
R2.0	1.55	85.0674	1.75336	39.7472	1.6287	47.4613	57.4253	24.2475		8.83		1.15326		1.47264	3.81863
Effect of coffee brewing on OTA
Unroasted	3.36027	67.6275	1.66	42.9553	2.19	29.3548	46.6459
R1.0	3.06089	70.5116	1.43	50.8591	1.4	54.8387	58.7365	10.3899		7.31911		1.47661		1.70134	3.49902	3.3102
R1.5	2.41636	76.721	1.46	49.8282	1.36	56.129	60.8927	14.0651		7.96364		1.44661		1.74134	3.7172	3.68048
R2.0	1.25	87.9576	1.52	47.7663	1.29	58.3871	64.7037	20.8269		9.13		1.38661		1.81134	4.10932	4.35322
		Before brewing	After brewing	Total reduction			Before brewing	After brewing				Before brewing	After brewing
Sample 2	Unroasted	10.38	3.36027	67.6301	Sample 4	Unroasted	2.90661	1.66	42.9553	Sample#8	Unroasted	3.10134	2.19	29.3548
	R1.0	9.72	3.06089	70.5202		R1.0	2.22998	1.43	50.8591		R1.0	2.61117	1.4	54.8387
	R1.5	3.69	2.41636	76.6859		R1.5	1.65044	1.46	49.8282		R1.5	2.08917	1.36	56.129
	R2.0	1.55	1.25	87.9576		R2.0	1.75336	1.52	47.7663		R2.0	1.6287	1.29	58.3871

## Sheet: Figure 3 AFs
Effect of coffee roasting on AFs
Roasting conditions	Replicate 1	Reduction (%)	Replicate 2	Reduction (%)	Replicate 3	Reduction (%)	Mean reduction %	SD
Unroasted	87.4		83.31		87.78
R1.0	59.92	31.4416	54.99	33.9935	61.01	30.4967	31.9773	1.8089
R1.5	44	49.6568	41.92	49.6819	52.89	39.7471	46.3619	5.72862
R2.0	38.41	56.0526	30.23	63.7138	30.9	64.7984	61.5216	4.76722
Effect of coffee brewing on AFs
After brewing
Unroasted	57.5587	34.1433	59.7667	28.2598	55.5594	36.7061	33.0364
R1.0	52.1132	40.3739	51.88	37.7266	50.532	42.4334	40.178	2.35952
R1.5	42.32	51.5789	40.21	51.7345	52.436	40.2643	47.8593	6.57785
R2.0	37.89	56.6476	29.5	64.5901	29.92	65.9148	62.3842	5.01196
		Before brewing	After brewing	Total reduction			Before brewing	After brewing				Before brewing	After brewing
Sample 2	Unroasted	10.38	3.36027	67.6301	Sample 4	Unroasted	2.90661	1.66	42.9553	Sample#8	Unroasted	3.10134	2.19	29.3548
	R1.0	9.72	3.06089	70.5202		R1.0	2.22998	1.43	50.8591		R1.0	2.61117	1.4	54.8387
	R1.5	3.69	2.41636	76.6859		R1.5	1.65044	1.46	49.8282		R1.5	2.08917	1.36	56.129
	R2.0	1.55	1.25	87.9576		R2.0	1.75336	1.52	47.7663		R2.0	1.6287	1.29	58.3871
